# Supplementary material
Source: HighWire-hosted journal article supplement (https://bmjopensem.bmj.com/content/3/1/e000261)
Supplement: inline-supplementary-material-1 [file inline-supplementary-material-1.docx]

| Search History Medline via pubmed (26-10-2015) | |  |  |
| --- | --- | --- | --- |
| Search | Query | Items found | Time |
| #4 | Search (#1 AND #2 AND #3) | 826 | 10:01:24 |
| #3 | Search (sport OR athlet* OR match OR competition) | 341409 | 10:01:05 |
| #2 | Search (Anxiety OR stress OR arousal) | 883659 | 10:00:19 |
| #1 | Search (hydrocortisone OR cortisol) | 86305 | 09:59:58 |

Appendix 1. Example search history pubmed
